# Supplementary material for: Whole grain-rich diet reduces body weight and systemic low-grade inflammation without inducing major changes of the gut microbiome: a randomised cross-over trial
Source: PubMed Central journal article supplement — Gut. 2017 Nov 1;68(1):83–93. doi: 10.1136/gutjnl-2017-314786 (PMC6839833; doi:10.1136/gutjnl-2017-314786), 2017-11-01
Supplement: gutjnl-2017-314786supp002.pdf [file gutjnl-2017-314786supp002.pdf]

**Table S1 Content of macronutrients, wholegrain, dietary fibres, resistant starch, arabinoxylan and alkylresorcinol homologs in the study products**

|                                    | Energy <sup>1</sup><br>(MJ/100g) | Protein <sup>1</sup><br>(g/100g) | Fat <sup>1</sup><br>(g/100g) | CHO <sup>1</sup><br>(g/100g) | WG <sup>1</sup><br>(g/100g) | Total DF <sup>1</sup><br>(g/100g) | RS <sup>2</sup><br>(g/100g) | AX <sup>2</sup><br>(g/100g) | Total AR <sup>2</sup><br>(µg/g) | AR C15:0 <sup>2</sup><br>(µg/g) | AR C17:1 <sup>2</sup><br>(µg/g) | AR C17:0 <sup>2</sup><br>(µg/g) | AR C19:1 <sup>2</sup><br>(µg/g) | AR C19:0 <sup>2</sup><br>(µg/g) | AR C21:1 <sup>2</sup><br>(µg/g) | AR C21:0 <sup>2</sup><br>(µg/g) | AR C23:1 <sup>2</sup><br>(µg/g) | AR C23:0 <sup>2</sup><br>(µg/g) | AR C25:1 <sup>2</sup><br>(µg/g) | AR C25:0 <sup>2</sup><br>(µg/g) |  |
|------------------------------------|----------------------------------|----------------------------------|------------------------------|------------------------------|-----------------------------|-----------------------------------|-----------------------------|-----------------------------|---------------------------------|---------------------------------|---------------------------------|---------------------------------|---------------------------------|---------------------------------|---------------------------------|---------------------------------|---------------------------------|---------------------------------|---------------------------------|---------------------------------|--|
| <b>Wholegrain products</b>         |                                  |                                  |                              |                              |                             |                                   |                             |                             |                                 |                                 |                                 |                                 |                                 |                                 |                                 |                                 |                                 |                                 |                                 |                                 |  |
| Rolled Oats                        | 1.43                             | 13                               | 6.5                          | 56                           | 100                         | 10                                | 6.1                         | 2.5                         | 0                               | 0                               | 0                               | 0                               | 0                               | 0                               | 0                               | 0                               | 0                               | 0                               | 0                               | 0                               |  |
| Oat flakes                         | 1.65                             | 12                               | 6                            | 68                           | 84                          | 9                                 | 8.1                         | 2.2                         | 0                               | 0                               | 0                               | 0                               | 0                               | 0                               | 0                               | 0                               | 0                               | 0                               | 0                               | 0                               |  |
| Wholegrain rye kernel bread        | 0.8                              | 6                                | 1                            | 35                           | 50                          | 8                                 | 5.3                         | 18.4                        | 934.2                           | 13.4                            | 33.0                            | 173.5                           | 76.4                            | 213.8                           | 60.3                            | 176.9                           | 29.3                            | 74.5                            | 21.4                            | 61.7                            |  |
| Wholegrain wheat buns              | 0.97                             | 9.5                              | 2.5                          | 38                           | 50                          | 9                                 | 4.8                         | 9.1                         | 352.1                           | 1.5                             | 2.6                             | 16.3                            | 18.0                            | 104.5                           | 14.1                            | 152.1                           | 0.0                             | 30.7                            | 0.0                             | 12.2                            |  |
| Wholegrain wheat pasta             | 1.45                             | 14                               | 2                            | 65                           | 55                          | 7                                 | 2.6                         | 5.4                         | 313.3                           | 0.0                             | 0.0                             | 2.3                             | 3.8                             | 37.1                            | 11.4                            | 172.0                           | 6.5                             | 58.6                            | 0.0                             | 21.4                            |  |
| Wholegrain wheat kernels           | 1.41                             | 11                               | 2.5                          | 61                           | 100                         | 12                                | 7.8                         | 7.3                         | 652.7                           | 3.2                             | 4.1                             | 25.3                            | 28.0                            | 185.3                           | 21.3                            | 289.9                           | 0.0                             | 65.0                            | 0.0                             | 30.6                            |  |
| Wholegrain bulgur                  | 1.49                             | 11                               | 1.5                          | 65                           | 100                         | 13                                | 3.2                         | 4.5                         | 376.9                           | 4.1                             | 4.5                             | 18.6                            | 22.2                            | 121.2                           | 13.7                            | 153.7                           | 0.0                             | 27.7                            | 0.0                             | 11.3                            |  |
| Wholegrain rye crisp bread         | 1.45                             | 9                                | 1.5                          | 66                           | 90                          | 15                                | 7.2                         | 9.5                         | 1120.8                          | 16.4                            | 40.1                            | 202.5                           | 93.1                            | 263.1                           | 71.9                            | 211.8                           | 35.4                            | 87.7                            | 23.0                            | 75.9                            |  |
| <b>Refined grain products</b>      |                                  |                                  |                              |                              |                             |                                   |                             |                             |                                 |                                 |                                 |                                 |                                 |                                 |                                 |                                 |                                 |                                 |                                 |                                 |  |
| Wheat-rice flakes                  | 1.61                             | 14                               | 1.5                          | 76                           | -                           | 2.5                               | 4.6                         | 1.5                         | 130.6                           | 1.5                             | 1.6                             | 5.5                             | 6.5                             | 37.0                            | 4.8                             | 56.7                            | 0.0                             | 11.8                            | 0.0                             | 5.1                             |  |
| Oat flakes                         | 1.65                             | 12                               | 6                            | 68                           | 84                          | 9                                 | -                           | 2.2                         | 0                               | 0                               | 0                               | 0                               | 0                               | 0                               | 0                               | 0                               | 0                               | 0                               | 0                               | 0                               |  |
| Maslin rye bread <sup>3</sup>      | 1.06                             | 9                                | 5                            | 38                           | -                           | 5                                 | 3.7                         | 8.8                         | 597.8                           | 9.5                             | 21.1                            | 114.3                           | 48.1                            | 136.4                           | 39.9                            | 112.9                           | 20.0                            | 47.9                            | 12.6                            | 35.3                            |  |
| Wheat buns                         | 1                                | 9                                | 1.5                          | 45                           | -                           | 2.5                               | 3.6                         | 6.5                         | 25.7                            | 0.0                             | 0.0                             | 1.3                             | 0.9                             | 6.2                             | 0.8                             | 10.6                            | 0.6                             | 3.6                             | 0.0                             | 1.7                             |  |
| Wheat pasta                        | 1.5                              | 12                               | 2                            | 71                           | -                           | 3.5                               | 2.7                         | 2.3                         | 48.9                            | 0.0                             | 0.1                             | 0.2                             | 0.6                             | 4.8                             | 1.8                             | 26.3                            | 1.2                             | 10.3                            | 0.0                             | 3.8                             |  |
| Pearled spelt kernels <sup>3</sup> | 1.45                             | 13                               | 3                            | 61                           | -                           | 7.5                               | 3.8                         | 4.6                         | 433.1                           | 1.7                             | 2.9                             | 13.7                            | 20.9                            | 107.8                           | 19.8                            | 213.3                           | 0.0                             | 52.8                            | 0.0                             | 0.0                             |  |
| Bulgur                             | 1.4                              | 12                               | 2.5                          | 63                           | -                           | -                                 | 2.8                         | 3.3                         | 70.1                            | 0.0                             | 0.0                             | 0.5                             | 1.1                             | 8.6                             | 2.9                             | 35.4                            | 1.6                             | 14.1                            | 0.0                             | 5.9                             |  |
| Crisp bread                        | 1.75                             | 12                               | 10                           | 65                           | -                           | 6                                 | 6                           | 2.8                         | 74.4                            | 0.0                             | 0.0                             | 3.2                             | 3.5                             | 21.5                            | 1.3                             | 34.2                            | 0.0                             | 7.6                             | 0.0                             | 3.1                             |  |

Abbreviations: AR, alkylresorcinols, AX, arabinoxylan; CHO, carbohydrates; DF, dietary fibres; RS, resistant starch; WG, wholegrain

<sup>1</sup>Derived from package labelling

<sup>2</sup>Experimental measured values

<sup>3</sup>The higher alkylresorcinol content in this product is due to a higher flour extraction rate than standard refined flour, but the product still does not contain all parts of the cereal grain and counts as a refined cereal product.

**Table S2 Baseline characteristics of study completers (mean  $\pm$  SD)**

|                                 | All (n=50)      | Men (n=18)      | Women (n=32)    |
|---------------------------------|-----------------|-----------------|-----------------|
| Age (y)                         | 48.6 $\pm$ 11.1 | 46.2 $\pm$ 11.8 | 49.9 $\pm$ 10.7 |
| BMI (kg/m <sup>2</sup> )        | 28.9 $\pm$ 3.6  | 29.1 $\pm$ 2.7  | 28.9 $\pm$ 4.0  |
| Waist circumference             | 101.4 $\pm$ 8.6 | 105.4 $\pm$ 7.0 | 99.2 $\pm$ 8.8  |
| Body weight (kg)                | 86.1 $\pm$ 13.0 | 93.8 $\pm$ 11.5 | 81.7 $\pm$ 11.8 |
| Body fat mass (kg)              | 28.9 $\pm$ 9.3  | 22.9 $\pm$ 6.3  | 32.3 $\pm$ 9.1  |
| Fat free mass                   | 57.2 $\pm$ 11.9 | 70.9 $\pm$ 7.4  | 49.5 $\pm$ 4.6  |
| Systolic BP (mmHg)              | 126 $\pm$ 13    | 130 $\pm$ 12    | 124 $\pm$ 13    |
| Diastolic BP (mmHg)             | 81 $\pm$ 8      | 82 $\pm$ 8      | 81 $\pm$ 9      |
| HOMA-IR                         | 3.0 $\pm$ 1.7   | 3.0 $\pm$ 1.4   | 2.9 $\pm$ 1.8   |
| Fasting plasma glucose (mmol/L) | 5.7 $\pm$ 0.6   | 5.8 $\pm$ 0.4   | 5.6 $\pm$ 0.7   |
| Fasting serum TAG               | 1.2 $\pm$ 0.5   | 1.3 $\pm$ 0.5   | 1.2 $\pm$ 0.5   |
| Fasting serum HDL cholesterol   | 1.3 $\pm$ 0.3   | 1.2 $\pm$ 0.2   | 1.4 $\pm$ 0.3   |

Abbreviations: BP, blood pressure; HOMA, Homeostatic model assessment for insulin resistance; FFA, free-fatty acids;

**Table S3 Study product consumption for all participants during wholegrain and refined grain periods (mean±SD)**

| <b>Wholegrain products</b>  | <b>Product intake<br/>(g/day)</b> | <b>Product intake<br/>(%)</b> | <b>Refined grain products</b> | <b>Product intake<br/>(g/day)</b> | <b>Product intake<br/>(%)</b> |
|-----------------------------|-----------------------------------|-------------------------------|-------------------------------|-----------------------------------|-------------------------------|
| Rolled Oats                 | 27.8 ± 15.4                       | 11%                           | Wheat-rice flakes             | 28.3 ± 14.9                       | 11%                           |
| Oat flakes                  | 11.7 ± 9.0                        | 5%                            | Oat flakes                    | 7.2 ± 5.7                         | 3%                            |
| Wholegrain rye kernel bread | 72.5 ± 25.7                       | 30%                           | Maslin rye bread              | 80.5 ± 30.1                       | 32%                           |
| Wholegrain wheat buns       | 60.7 ± 18.1                       | 25%                           | Wheat buns                    | 68.6 ± 20.5                       | 27%                           |
| Wholegrain wheat pasta      | 20.5 ± 8.4                        | 8%                            | Wheat pasta                   | 19.5 ± 10.0                       | 8%                            |
| Wholegrain wheat kernels    | 12.5 ± 8.5                        | 5%                            | Pearled spelt kernels         | 15.4 ± 8.0                        | 6%                            |
| Wholegrain bulgur           | 19.8 ± 10.8                       | 8%                            | Bulgur                        | 19.6 ± 7.9                        | 8%                            |
| Wholegrain rye crisp bread  | 18.1 ± 8.6                        | 7%                            | Crisp bread                   | 16.2 ± 8.3                        | 6%                            |

Intervention products substituted all dietary cereal products during the studies and were consumed *ad libitum*

**Table S4 Average monosaccharide composition of the refined grain and wholegrain products (values are presented as mean  $\pm$  SD)**

| <b>Monosaccharide</b> | <b>Refined grain products<br/>(mg/g dry matter)</b> | <b>Wholegrain products<br/>(mg/g dry matter)</b> | <b>Fold difference<br/>(wholegrain/control)</b> |
|-----------------------|-----------------------------------------------------|--------------------------------------------------|-------------------------------------------------|
| Fucose                | 0.0 $\pm$ 0.0                                       | 0.1 $\pm$ 0.0                                    | 2.1                                             |
| Arabinose             | 11.4 $\pm$ 0.2                                      | 19.9 $\pm$ 1.5                                   | 1.8                                             |
| Rhamnose              | Nd                                                  | Nd                                               | -                                               |
| Galactose             | 4.3 $\pm$ 0.1                                       | 5.1 $\pm$ 0.4                                    | 1.2                                             |
| Starch glucose        | 769.2 $\pm$ 11.7                                    | 740.3 $\pm$ 32.7                                 | 1                                               |
| Non-starch glucose    | 55.0 $\pm$ 2.0                                      | 64.9 $\pm$ 3.4                                   | 1.2                                             |
| Xylose                | 17.1 $\pm$ 0.3                                      | 29.2 $\pm$ 2.9                                   | 1.7                                             |
| Mannose               | 1.9 $\pm$ 0.1                                       | 2.5 $\pm$ 0.3                                    | 1.3                                             |
| Galacturonic acid     | 5.8 $\pm$ 0.1                                       | 1.7 $\pm$ 0.2                                    | 0.3                                             |
| Glucuronic acid       | Nd                                                  | 0.5 $\pm$ 0.1                                    | -                                               |
| Ash                   | 21.5 $\pm$ 1.1                                      | 21.5 $\pm$ 1.1                                   | 1                                               |

Nd, not detected

Monosaccharide composition analysis was performed in triplicates

**Table S5 Diet composition of the subjects before and during the interventions**

| <b>Food group<sup>1</sup></b> | <b>Baseline diet</b>          | <b>Refined grain diet</b>     | <b>Wholegrain diet</b>           |
|-------------------------------|-------------------------------|-------------------------------|----------------------------------|
|                               | <i>Mean (CI 95%)</i>          | <i>Mean (CI 95%)</i>          | <i>Mean (CI 95%)</i>             |
| Milk and milk products        | 286 (231-342)                 | 284 (228-341)                 | 284 (222-347)                    |
| Cheese and cheese products    | 37 (31-43)                    | 34 (26-42)                    | 31 (23-39)                       |
| Cereals and starch products   | 246 (222-270)                 | 291 (274-309) <sup>a</sup>    | 288 (268-309) <sup>a</sup>       |
| Vegetables                    | 190 (144-236) <sup>a</sup>    | 143 (106-181) <sup>b</sup>    | 161 (124-198) <sup>a,b</sup>     |
| Fruits                        | 160 (131-189) <sup>a</sup>    | 187 (143-232) <sup>a,b</sup>  | 204 (158-250) <sup>b</sup>       |
| Meat                          | 106 (90-122)                  | 106 (89-122)                  | 97 (83-111)                      |
| Fish                          | 22 (16-27)                    | 26 (19-33)                    | 27 (18-35)                       |
| Poultry                       | 36 (25-47)                    | 30 (21-40)                    | 35 (23-47)                       |
| Eggs                          | 24 (18-30)                    | 22 (16-28)                    | 19 (13-26)                       |
| Potatoes                      | 74 (57-91)                    | 29 (18-40) <sup>a</sup>       | 31 (19-44) <sup>a</sup>          |
| <b>Dietary fibre</b>          | <b>23 (21-26)<sup>a</sup></b> | <b>21 (19-23)<sup>a</sup></b> | <b>33 (31-36)<sup>b</sup></b>    |
| <b>Wholegrain</b>             | <b>68 (56-79)<sup>a</sup></b> | <b>13 (10-16)<sup>b</sup></b> | <b>179 (165-192)<sup>c</sup></b> |
| Water                         | 2007 (1789-2225) <sup>a</sup> | 1795 (1569-2021) <sup>b</sup> | 2029 (1804-2255) <sup>a,b</sup>  |

<sup>1</sup>Dietary intake (g/day) was based on the average of 4 days dietary registration by all subjects (n=50)

Differences between diets were assessed by a one-way ANOVA with Tukey's Multiple Comparison test. Different superscripts mean statistically different within a row (P<0.05).

**Table S6 Associations between serum inflammatory markers and plasma alkylresorcinols**

| Plasma alkylresorcinols | Serum CRP   |         | Serum IL-6  |         |
|-------------------------|-------------|---------|-------------|---------|
|                         | Effect size | P-value | Effect size | P-value |
| C17:0                   | -0.11       | 0.18    | -0.18       | 0.0003  |
| C19:0                   | -0.11       | 0.18    | -0.11       | 0.027   |
| C20:0                   | 0.00        | 0.97    | -0.01       | 0.84    |
| C21:0                   | -0.12       | 0.12    | -0.07       | 0.13    |
| C22:0                   | -0.05       | 0.13    | -0.02       | 0.35    |
| C23:0                   | -0.12       | 0.11    | -0.08       | 0.10    |
| C24:0                   | -0.04       | 0.33    | 0.00        | 0.91    |
| C25:0                   | -0.11       | 0.13    | -0.08       | 0.06    |
| C26:0                   | 0.01        | 0.75    | 0.02        | 0.50    |
| Total (C17:0-C26:0)     | -0.13       | 0.11    | -0.09       | 0.059   |
| C17:0-to-C21:0 ratio    | 0.03        | 0.76    | -0.17       | 0.024   |

Calculated using linear mixed model adjusting for age and gender (n=50) on log-transformed plasma alkylresorcinol data with added pseudocounts where the minimum value for each homolog was substituted instead of a zero value.

Table S7 Changes in metagenomic species (MGS)

| MGS         | Taxonomical annotation             | Prevalence | Prevalence (WG->C) | Prevalence (C->WG) | Median fold change Wholegrain | Median fold change Control | Linear mixed model effect size | P-value | FDR-corrected P |
|-------------|------------------------------------|------------|--------------------|--------------------|-------------------------------|----------------------------|--------------------------------|---------|-----------------|
| MGS:igc654  | Clostridiales                      | 28         | 14                 | 14                 | 1.76                          | 0.66                       | 2.05                           | 0.0004  | 0.16            |
| MGS:igc102  | Erysipelatoclostridium ramosum     | 25         | 14                 | 11                 | 0.81                          | 0.77                       | -2.66                          | 0.0008  | 0.16            |
| MGS:igc460  | Clostridiales                      | 20         | 10                 | 10                 | 1.02                          | 0.99                       | -2.48                          | 0.001   | 0.16            |
| MGS:igc633  | Clostridiales                      | 41         | 22                 | 19                 | 1.22                          | 0.65                       | 1.41                           | 0.001   | 0.16            |
| MGS:igc139  | Ruminococcus                       | 46         | 25                 | 21                 | 0.54                          | 1.67                       | -1.64                          | 0.002   | 0.18            |
| MGS:igc291  | Faecalibacterium prausnitzii       | 48         | 27                 | 21                 | 1.21                          | 0.75                       | 0.93                           | 0.002   | 0.22            |
| MGS:igc359  | Clostridiales                      | 43         | 24                 | 19                 | 1.17                          | 1.04                       | 1.77                           | 0.004   | 0.30            |
| MGS:igc309  | Ruminococcus lactaris              | 40         | 23                 | 17                 | 1.01                          | 0.53                       | 1.82                           | 0.005   | 0.31            |
| MGS:igc734  | Streptococcus thermophilus         | 48         | 27                 | 21                 | 0.59                          | 0.87                       | -1.56                          | 0.006   | 0.33            |
| MGS:igc584  | Holdemanella biformis              | 22         | 9                  | 13                 | 0.80                          | 1.37                       | -1.49                          | 0.007   | 0.38            |
| MGS:igc517  | Faecalibacterium prausnitzii       | 48         | 27                 | 21                 | 1.34                          | 0.83                       | 0.98                           | 0.010   | 0.38            |
| MGS:igc171  | Faecalibacterium prausnitzii       | 48         | 27                 | 21                 | 1.20                          | 0.99                       | 0.59                           | 0.011   | 0.38            |
| MGS:igc213  | Coprococcus                        | 42         | 23                 | 19                 | 1.07                          | 0.59                       | 1.44                           | 0.011   | 0.38            |
| MGS:igc9    | Bacteroides thetaiotaomicron       | 42         | 23                 | 19                 | 0.94                          | 1.37                       | -0.70                          | 0.011   | 0.38            |
| MGS:igc263  | Prevotella copri                   | 34         | 19                 | 15                 | 1.06                          | 0.87                       | 1.52                           | 0.011   | 0.38            |
| MGS:igc292  | Faecalibacterium prausnitzii       | 47         | 26                 | 21                 | 1.24                          | 0.77                       | 1.09                           | 0.012   | 0.38            |
| MGS:igc157  | Clostridiales                      | 27         | 12                 | 15                 | 0.76                          | 1.55                       | -1.24                          | 0.012   | 0.38            |
| MGS:igc762  | Clostridiales                      | 35         | 18                 | 17                 | 0.69                          | 1.05                       | -1.09                          | 0.016   | 0.43            |
| MGS:igc1140 | Bacteria                           | 12         | 8                  | 4                  | 0.97                          | 1.14                       | 5.17                           | 0.017   | 0.43            |
| MGS:igc784  | Clostridiales bacterium 1_7_47FAA  | 23         | 9                  | 14                 | 0.65                          | 1.37                       | -2.20                          | 0.017   | 0.43            |
| MGS:igc613  | Clostridiales                      | 13         | 8                  | 5                  | 1.54                          | 0.72                       | 2.81                           | 0.018   | 0.43            |
| MGS:igc89   | Subdoligranulum sp. 4_3_54A2FAA    | 48         | 27                 | 21                 | 0.86                          | 1.30                       | -0.69                          | 0.020   | 0.43            |
| MGS:igc886  | Erysipelotrichaceae                | 19         | 11                 | 8                  | 1.16                          | 0.61                       | 2.61                           | 0.021   | 0.43            |
| MGS:igc389  | Clostridiales                      | 18         | 10                 | 8                  | 0.99                          | 0.50                       | 2.43                           | 0.022   | 0.43            |
| MGS:igc763  | Clostridiales                      | 25         | 11                 | 14                 | 0.64                          | 1.16                       | -1.94                          | 0.022   | 0.43            |
| MGS:igc745  | Streptococcus salivarius           | 48         | 27                 | 21                 | 0.88                          | 1.33                       | -0.50                          | 0.023   | 0.43            |
| MGS:igc1203 | Bacteria                           | 42         | 23                 | 19                 | 0.99                          | 0.47                       | 0.93                           | 0.023   | 0.43            |
| MGS:igc318  | Bacteria                           | 27         | 15                 | 12                 | 0.59                          | 1.17                       | -2.15                          | 0.024   | 0.43            |
| MGS:igc1259 | Eukaryota                          | 14         | 9                  | 5                  | 0.12                          | 0.50                       | -3.44                          | 0.024   | 0.43            |
| MGS:igc818  | Clostridiales                      | 24         | 15                 | 9                  | 0.79                          | 1.12                       | -1.67                          | 0.024   | 0.43            |
| MGS:igc938  | Firmicutes                         | 40         | 22                 | 18                 | 1.04                          | 0.78                       | 1.19                           | 0.025   | 0.43            |
| MGS:igc644  | Clostridiales                      | 32         | 20                 | 12                 | 1.06                          | 0.56                       | 1.63                           | 0.029   | 0.46            |
| MGS:igc100  | Bacteroides                        | 17         | 8                  | 9                  | 0.99                          | 1.29                       | -1.84                          | 0.029   | 0.46            |
| MGS:igc732  | butyrate-producing bacterium S53/4 | 47         | 26                 | 21                 | 1.44                          | 0.75                       | 0.77                           | 0.030   | 0.46            |
| MGS:igc24   | Bacteroides                        | 39         | 22                 | 17                 | 0.79                          | 1.24                       | -0.89                          | 0.030   | 0.46            |
| MGS:igc691  | Lachnospiraceae                    | 47         | 27                 | 20                 | 1.25                          | 0.99                       | 0.89                           | 0.032   | 0.47            |
| MGS:igc1200 | Blautia                            | 31         | 15                 | 16                 | 0.57                          | 0.92                       | -1.52                          | 0.034   | 0.48            |
| MGS:igc347  | Bacteroidales                      | 14         | 8                  | 6                  | 0.84                          | 0.53                       | -2.28                          | 0.036   | 0.48            |
| MGS:igc1207 | Clostridiales                      | 11         | 6                  | 5                  | 0.01                          | 0.21                       | -4.90                          | 0.036   | 0.48            |
| MGS:igc54   | [Clostridium] citroniae            | 41         | 21                 | 20                 | 0.96                          | 0.87                       | -1.37                          | 0.039   | 0.48            |
| MGS:igc351  | Clostridiales                      | 31         | 16                 | 15                 | 0.95                          | 0.98                       | 1.62                           | 0.039   | 0.48            |
| MGS:igc640  | Intestinimonas sp. GD2             | 31         | 16                 | 15                 | 0.67                          | 0.78                       | -1.96                          | 0.039   | 0.48            |
| MGS:igc199  | Clostridiales                      | 10         | 4                  | 6                  | 6.84                          | 2.82                       | -3.34                          | 0.041   | 0.48            |
| MGS:igc301  | Tyzzrella nexilis                  | 13         | 7                  | 6                  | 0.01                          | 0.21                       | -3.47                          | 0.045   | 0.48            |
| MGS:igc801  | Bacteria                           | 16         | 7                  | 9                  | 1.32                          | 1.04                       | 1.82                           | 0.046   | 0.48            |
| MGS:igc758  | Bifidobacterium dentium            | 19         | 12                 | 7                  | 0.38                          | 1.12                       | -2.27                          | 0.047   | 0.48            |
| MGS:igc511  | Dorea formicigenerans              | 48         | 27                 | 21                 | 1.00                          | 0.99                       | 0.53                           | 0.048   | 0.48            |
| MGS:igc281  | Bacteria                           | 11         | 6                  | 5                  | 0.43                          | 1.51                       | -2.44                          | 0.048   | 0.48            |
| MGS:igc169  | Anaerostipes hadrus                | 48         | 27                 | 21                 | 1.23                          | 1.23                       | 0.63                           | 0.048   | 0.48            |
| MGS:igc749  | Coprococcus eutactus               | 18         | 10                 | 8                  | 1.25                          | 0.04                       | 2.26                           | 0.048   | 0.48            |
| MGS:igc832  | Senegalimassilia anaerobia         | 23         | 11                 | 12                 | 0.82                          | 1.04                       | -1.15                          | 0.049   | 0.48            |

Calculated using linear mixed model adjusted for age and gender followed by correction for multiple testing by the Benjamini-Hochberg approach (n=48)

Table S8 Changes in prokaryotic KEGG orthologies

| KEGG        | Definition                                                                                                                                   | Prevalence | Prevalence (WG>C) | Prevalence (C>WG) | Median fold change Wholegrain | Median fold change Control | Linear mixed model effect size | P-value  | FDR-corrected P |
|-------------|----------------------------------------------------------------------------------------------------------------------------------------------|------------|-------------------|-------------------|-------------------------------|----------------------------|--------------------------------|----------|-----------------|
| K15915      | undecaprenyl phosphate N,N'-diacyltolbacillosamine-1-phosphate transferase [EC:2.7.8.36]                                                     | 13         | 7                 | 6                 | 0.00                          | 0.50                       | -1.35                          | 1.79E-07 | 0.0004          |
| K10188      | lactose/L-arabinose transport system substrate-binding protein                                                                               | 37         | 17                | 20                | 1.36                          | 0.70                       | 1.31                           | 2.62E-06 | 0.007           |
| K18691      | membrane-bound lytic murein transglycosylase F                                                                                               | 18         | 10                | 8                 | 0.00                          | 0.50                       | -1.55                          | 8.13E-05 | 0.05            |
| K09802      | uncharacterized protein                                                                                                                      | 42         | 24                | 18                | 0.67                          | 0.74                       | -0.98                          | 0.0002   | 0.11            |
| K12527      | putative selenate reductase [EC:1.97.1.9]                                                                                                    | 38         | 21                | 17                | 1.00                          | 0.00                       | 0.85                           | 0.001    | 0.39            |
| K03342      | para-aminobenzoate synthetase / 4-amino-4-deoxychorismate lyase [EC:2.6.1.85 4.1.3.38]                                                       | 30         | 16                | 14                | 0.40                          | 1.00                       | -1.55                          | 0.001    | 0.39            |
| K17680      | twinkle protein [EC:3.6.4.12]                                                                                                                | 47         | 26                | 21                | 1.11                          | 0.50                       | 0.71                           | 0.001    | 0.39            |
| K19174      | DNA phosphorothioation-dependent restriction protein DptG                                                                                    | 28         | 17                | 11                | 0.00                          | 1.00                       | -1.34                          | 0.002    | 0.39            |
| K02786      | PTS system, lactose-specific IIA component [EC:2.7.1.207]                                                                                    | 45         | 26                | 19                | 1.54                          | 0.48                       | 1.00                           | 0.002    | 0.41            |
| K10001      | glutamate/aspartate transport system substrate-binding protein                                                                               | 31         | 15                | 16                | 0.00                          | 0.00                       | -1.20                          | 0.002    | 0.41            |
| K05539      | tRNA-dihydrouridine synthase A [EC:1.1.1.11]                                                                                                 | 38         | 21                | 17                | 0.75                          | 1.19                       | -0.83                          | 0.003    | 0.41            |
| K14055      | universal stress protein E                                                                                                                   | 12         | 7                 | 5                 | 0.00                          | 1.10                       | -1.51                          | 0.003    | 0.41            |
| K08987      | putative membrane protein                                                                                                                    | 41         | 21                | 20                | 0.09                          | 1.24                       | -1.09                          | 0.003    | 0.41            |
| K09963      | uncharacterized protein                                                                                                                      | 39         | 23                | 16                | 0.18                          | 0.83                       | -0.92                          | 0.003    | 0.41            |
| K02055      | putative spermidine/putrescine transport system substrate-binding protein                                                                    | 13         | 7                 | 6                 | 4.00                          | 0.00                       | 2.02                           | 0.003    | 0.41            |
| K01941      | urea carboxylase [EC:6.3.4.6]                                                                                                                | 16         | 8                 | 8                 | 0.50                          | 0.00                       | 0.68                           | 0.003    | 0.41            |
| K01277      | dipeptidyl-peptidase III [EC:3.4.14.4]                                                                                                       | 47         | 26                | 21                | 1.19                          | 0.79                       | 0.78                           | 0.004    | 0.41            |
| K09712      | uncharacterized protein                                                                                                                      | 31         | 17                | 14                | 0.00                          | 1.00                       | -1.21                          | 0.004    | 0.43            |
| K13631      | AraC family transcriptional regulator, mar-sox-rob regulon activator                                                                         | 30         | 15                | 15                | 0.00                          | 0.46                       | -0.88                          | 0.004    | 0.43            |
| K01902      | succinyl-CoA synthetase alpha subunit [EC:6.2.1.5]                                                                                           | 38         | 22                | 16                | 0.53                          | 0.97                       | -0.76                          | 0.004    | 0.43            |
| K11905      | type VI secretion system protein                                                                                                             | 33         | 17                | 16                | 0.00                          | 0.18                       | -1.22                          | 0.005    | 0.43            |
| K02532      | MFS transporter, OHS family, lactose permease                                                                                                | 23         | 11                | 12                | 0.00                          | 1.00                       | -1.10                          | 0.005    | 0.46            |
| K03338      | 5-dehydro-2-deoxygluconokinase [EC:2.7.1.92]                                                                                                 | 40         | 22                | 18                | 0.34                          | 1.16                       | -0.97                          | 0.006    | 0.50            |
| K07164      | uncharacterized protein                                                                                                                      | 42         | 23                | 19                | 0.52                          | 0.84                       | -0.85                          | 0.006    | 0.53            |
| K08963      | methylthioribose-1-phosphate isomerase [EC:5.3.1.23]                                                                                         | 48         | 27                | 21                | 1.18                          | 0.83                       | 0.62                           | 0.007    | 0.53            |
| K05346      | deoxyribonucleoside regulator                                                                                                                | 32         | 16                | 16                | 0.00                          | 0.00                       | -1.16                          | 0.007    | 0.53            |
| K02833      | selenocysteine-specific elongation factor                                                                                                    | 48         | 27                | 21                | 0.87                          | 1.21                       | -0.68                          | 0.007    | 0.53            |
| K08320      | (d)JCTP diphosphatase [EC:3.6.1.65]                                                                                                          | 11         | 7                 | 4                 | 0.00                          | 1.50                       | -1.59                          | 0.008    | 0.53            |
| K09973      | uncharacterized protein                                                                                                                      | 37         | 21                | 16                | 0.50                          | 0.67                       | -0.77                          | 0.008    | 0.53            |
| K08316      | 16S rRNA (guanine966-N2)-methyltransferase [EC:2.1.1.171]                                                                                    | 48         | 27                | 21                | 0.31                          | 0.54                       | -0.87                          | 0.008    | 0.53            |
| K06928      | nucleoside-triphosphatase [EC:3.6.1.15]                                                                                                      | 11         | 6                 | 5                 | 1.00                          | 0.00                       | 0.69                           | 0.008    | 0.53            |
| K01476      | arginase [EC:3.5.3.1]                                                                                                                        | 20         | 11                | 9                 | 1.00                          | 0.50                       | 1.10                           | 0.009    | 0.54            |
| K07704      | two-component system, LytT family, sensor histidine kinase LytS [EC:2.7.13.3]                                                                | 40         | 23                | 17                | 1.00                          | 0.39                       | 0.73                           | 0.009    | 0.54            |
| K01224      | arabinogalactan endo-1,4-beta-galactosidase [EC:3.2.1.89]                                                                                    | 48         | 27                | 21                | 0.80                          | 1.19                       | -0.60                          | 0.010    | 0.54            |
| K01846      | methylaspartate mutase sigma subunit [EC:5.4.99.1]                                                                                           | 16         | 10                | 6                 | 0.00                          | 1.00                       | -1.32                          | 0.010    | 0.54            |
| K06143      | inner membrane protein                                                                                                                       | 25         | 15                | 10                | 0.00                          | 0.25                       | -1.27                          | 0.011    | 0.54            |
| K02775      | PTS system, galactitol-specific IIC component                                                                                                | 45         | 24                | 21                | 0.45                          | 0.74                       | -0.70                          | 0.011    | 0.54            |
| K07141      | molybdenum cofactor cytidyltransferase [EC:2.7.7.76]                                                                                         | 48         | 27                | 21                | 1.21                          | 0.87                       | 0.35                           | 0.011    | 0.54            |
| K06058      | 2-oxoglutarate dehydrogenase E2 component (dihydropyruvate succinyltransferase) [EC:2.3.1.61]                                                | 13         | 7                 | 6                 | 0.50                          | 1.00                       | -1.37                          | 0.011    | 0.54            |
| K09691      | lipopolysaccharide transport system ATP-binding protein                                                                                      | 38         | 20                | 18                | 0.67                          | 0.90                       | -0.88                          | 0.011    | 0.54            |
| K01447      | N-acetylmuramoyl-L-alanine amidase [EC:3.5.1.28]                                                                                             | 48         | 27                | 21                | 0.95                          | 1.15                       | -0.43                          | 0.012    | 0.54            |
| K10543      | D-xylose transport system substrate-binding protein                                                                                          | 14         | 5                 | 9                 | 0.00                          | NA                         | -1.06                          | 0.012    | 0.54            |
| K07342      | protein transport protein SEC61 subunit gamma and related proteins                                                                           | 47         | 26                | 21                | 0.47                          | 0.39                       | 0.71                           | 0.012    | 0.54            |
| K02380      | FdhE protein                                                                                                                                 | 37         | 20                | 17                | 1.35                          | 0.00                       | 0.70                           | 0.012    | 0.54            |
| K14060      | putative DNA-invertase from lambdaoid prophage Rac                                                                                           | 40         | 22                | 18                | 0.24                          | 0.50                       | -0.88                          | 0.013    | 0.54            |
| K10009      | cystine transport system permease protein                                                                                                    | 38         | 20                | 18                | 0.05                          | 0.37                       | -1.23                          | 0.013    | 0.54            |
| K01483      | ureidoglycolate lyase [EC:4.3.2.3]                                                                                                           | 37         | 20                | 17                | 0.33                          | 0.46                       | -1.00                          | 0.013    | 0.54            |
| K02839      | peptide chain release factor                                                                                                                 | 35         | 19                | 16                | 0.38                          | 0.50                       | -0.83                          | 0.014    | 0.54            |
| K13920      | propanediol dehydratase small subunit [EC:4.2.1.28]                                                                                          | 28         | 13                | 15                | 0.00                          | 0.00                       | -0.91                          | 0.014    | 0.54            |
| K03649      | TDG/mug DNA glycosylase family protein [EC:3.2.2.-]                                                                                          | 12         | 9                 | 3                 | 1.50                          | 0.40                       | 1.35                           | 0.014    | 0.54            |
| K07459      | putative ATP-dependent endonuclease of the OLD family                                                                                        | 48         | 27                | 21                | 1.17                          | 0.87                       | 0.55                           | 0.014    | 0.54            |
| K02387      | flagellar basal-body rod protein FlgB                                                                                                        | 48         | 27                | 21                | 0.67                          | 1.40                       | -0.69                          | 0.015    | 0.54            |
| K10530      | lactate oxidase [EC:1.13.12.-]                                                                                                               | 30         | 19                | 11                | 0.00                          | 0.50                       | -0.97                          | 0.015    | 0.54            |
| K05516      | curved DNA-binding protein                                                                                                                   | 45         | 26                | 19                | 0.81                          | 1.18                       | -0.56                          | 0.015    | 0.54            |
| K10984      | PTS system, galactosamine-specific IIB component [EC:2.7.1.-]                                                                                | 10         | 5                 | 5                 | 0.00                          | 0.82                       | -1.00                          | 0.016    | 0.54            |
| K02652      | type IV pilus assembly protein PilB                                                                                                          | 40         | 24                | 16                | 0.30                          | 0.60                       | -0.71                          | 0.017    | 0.54            |
| K00350      | Na+-transporting NADH:ubiquinone oxidoreductase subunit E [EC:1.6.5.8]                                                                       | 48         | 27                | 21                | 0.78                          | 0.94                       | -0.53                          | 0.017    | 0.54            |
| K11051      | multidrug/hemolysin transport system permease protein                                                                                        | 46         | 26                | 20                | 1.00                          | 0.62                       | 0.63                           | 0.018    | 0.54            |
| K10241      | cellobiose transport system permease protein                                                                                                 | 14         | 7                 | 7                 | 0.00                          | 0.00                       | -1.22                          | 0.018    | 0.54            |
| K06306      | spore germination protein                                                                                                                    | 48         | 27                | 21                | 1.50                          | 1.00                       | 0.74                           | 0.019    | 0.54            |
| K10824      | nickel transport system ATP-binding protein [EC:3.6.3.24]                                                                                    | 15         | 10                | 5                 | 1.00                          | 1.00                       | -1.03                          | 0.019    | 0.54            |
| K13018      | UDP-2-acetamido-3-amino-2,3-dideoxyglucuronate N-acetyltransferase [EC:2.3.1.201]                                                            | 47         | 26                | 21                | 0.21                          | 1.35                       | -0.84                          | 0.019    | 0.54            |
| K01708      | galactarate dehydratase [EC:4.2.1.42]                                                                                                        | 14         | 7                 | 7                 | 0.22                          | 0.77                       | -1.29                          | 0.019    | 0.54            |
| K13931      | malonate decarboxylase delta subunit                                                                                                         | 37         | 22                | 15                | 0.25                          | 0.19                       | -0.95                          | 0.020    | 0.54            |
| K14564      | nucleolar protein 56                                                                                                                         | 27         | 15                | 12                | 0.00                          | 0.23                       | -0.94                          | 0.020    | 0.54            |
| K03491      | lichen operon transcriptional antiterminator                                                                                                 | 48         | 27                | 21                | 0.84                          | 1.07                       | -0.47                          | 0.020    | 0.54            |
| K05020      | glycine betaine transporter                                                                                                                  | 16         | 10                | 6                 | 1.52                          | 1.07                       | 1.35                           | 0.020    | 0.54            |
| K00526      | ribonucleoside-diphosphate reductase beta chain [EC:1.17.4.1]                                                                                | 42         | 23                | 20                | 0.50                          | 1.02                       | -0.66                          | 0.020    | 0.54            |
| K13683      | putative colanic acid biosynthesis glycosyltransferase [EC:4.2.4.-]                                                                          | 13         | 3                 | 9                 | 0.17                          | 1.00                       | 1.63                           | 0.020    | 0.54            |
| K03212      | 23S rRNA (uracil747-C5)-methyltransferase [EC:2.1.1.189]                                                                                     | 11         | 5                 | 6                 | 0.23                          | 1.03                       | -1.22                          | 0.021    | 0.54            |
| K09773      | [pyruvate, water dikinase]:phosphate phosphotransferase / [pyruvate, water dikinase] kinase [EC:2.7.4.28 2.7.11.33]                          | 14         | 7                 | 7                 | 0.00                          | 0.14                       | -1.26                          | 0.021    | 0.54            |
| K02806      | PTS system, nitrogen regulatory IIA component [EC:2.7.1.-]                                                                                   | 45         | 24                | 21                | 0.59                          | 1.20                       | -0.73                          | 0.021    | 0.54            |
| K00364      | GMP reductase [EC:1.7.1.7]                                                                                                                   | 47         | 26                | 21                | 1.00                          | 1.22                       | -0.70                          | 0.021    | 0.54            |
| K05952      | uncharacterized protein                                                                                                                      | 22         | 14                | 8                 | 0.00                          | 0.16                       | -1.08                          | 0.022    | 0.54            |
| K18979      | epoxyqueuosine reductase [EC:1.17.99.6]                                                                                                      | 48         | 27                | 21                | 1.00                          | 1.05                       | -0.65                          | 0.022    | 0.54            |
| K00112      | glycerol-3-phosphate dehydrogenase subunit B [EC:1.1.5.3]                                                                                    | 35         | 17                | 18                | 0.50                          | 0.95                       | -0.76                          | 0.022    | 0.54            |
| K17235      | arabinoxylan transport system permease protein                                                                                               | 29         | 15                | 14                | 0.00                          | 0.00                       | -0.79                          | 0.023    | 0.54            |
| K08218      | MFS transporter, PAT family, beta-lactamase induction signal transducer AmpG                                                                 | 48         | 27                | 21                | 0.88                          | 1.31                       | -0.44                          | 0.023    | 0.54            |
| K03549      | KUP system potassium uptake protein                                                                                                          | 29         | 17                | 12                | 0.00                          | 0.33                       | -0.98                          | 0.023    | 0.54            |
| K02855      | AraC family transcriptional regulator, L-rhamnose operon regulatory protein RhaS                                                             | 48         | 27                | 21                | 0.92                          | 0.69                       | 0.82                           | 0.023    | 0.54            |
| K00603      | glutamate formiminotransferase [EC:2.1.2.5]                                                                                                  | 39         | 20                | 19                | 0.78                          | 1.00                       | -0.82                          | 0.023    | 0.54            |
| K10120      | fructooligosaccharide transport system substrate-binding protein                                                                             | 26         | 14                | 12                | 0.00                          | 0.50                       | -1.15                          | 0.023    | 0.54            |
| K03824      | putative acetyltransferase [EC:2.3.1.-]                                                                                                      | 22         | 12                | 10                | 0.63                          | 0.94                       | -0.82                          | 0.023    | 0.54            |
| K12507      | acyl-CoA synthetase [EC:6.2.1.-]                                                                                                             | 20         | 13                | 7                 | 0.35                          | 0.48                       | -1.13                          | 0.023    | 0.54            |
| K02744      | PTS system, N-acetylglucosamine-specific IIA component [EC:2.7.1.-]                                                                          | 48         | 27                | 21                | 0.77                          | 1.19                       | -0.46                          | 0.023    | 0.54            |
| K02803,K028 | PTS system, N-acetylglucosamine-specific IIB component [EC:2.7.1.193], PTS system, N-acetylglucosamine-specific IIC component [EC:2.7.1.194] | 48         | 27                | 21                | 1.36                          | 0.90                       | 0.54                           | 0.023    | 0.54            |
| K10008      | glutamate transport system ATP-binding protein [EC:3.6.3.-]                                                                                  | 33         | 18                | 15                | 0.10                          | 0.66                       | -0.69                          | 0.025    | 0.55            |
| K06015      | N-acyl-D-amino-acid deacetylase [EC:3.5.1.81]                                                                                                | 44         | 25                | 19                | 0.62                          | 0.89                       | -0.75                          | 0.025    | 0.55            |
| K12990      | rhamnosyltransferase [EC:2.4.1.-]                                                                                                            | 36         | 20                | 16                | 0.83                          | 0.38                       | 1.01                           | 0.026    | 0.55            |
| K04103      | indolepyruvate decarboxylase [EC:4.1.1.74]                                                                                                   | 10         | 6                 | 4                 | 1.00                          | 23.50                      | -0.86                          | 0.026    | 0.55            |
| K03636      | molybdopterin synthase sulfur carrier subunit                                                                                                | 46         | 25                | 21                | 1.00                          | 1.48                       | -0.57                          | 0.027    | 0.55            |
| K07588      | LAO/AO transport system kinase [EC:2.7.-.]                                                                                                   | 32         | 16                | 16                | 0.49                          | 0.68                       | -0.97                          | 0.027    | 0.55            |
| K00091      | dihydroflavonol-4-reductase [EC:1.1.1.219]                                                                                                   | 31         | 16                | 15                | 1.00                          | 0.50                       | 0.70                           | 0.027    | 0.55            |
| K03475      | PTS system, ascorbate-specific IIC component                                                                                                 | 37         | 21                | 16                | 0.50                          | 0.89                       | -1.01                          | 0.027    | 0.55            |
| K19114      | CRISPR-associated protein Csh1                                                                                                               | 34         | 19                | 15                | 0.67                          | 0.78                       | -0.96                          | 0.028    | 0.55            |
| K05795      | tellurium resistance protein TerD                                                                                                            | 47         | 26                | 21                | 1.17                          | 0.84                       | 0.55                           | 0.028    | 0.55            |



|        |                                                                                                       |    |    |    |      |      |       |       |      |
|--------|-------------------------------------------------------------------------------------------------------|----|----|----|------|------|-------|-------|------|
| K06421 | small acid-soluble spore protein D (minor alpha/beta-type SASP)                                       | 14 | 8  | 6  | 0.00 | 0.00 | 1.24  | 0.028 | 0.55 |
| K10039 | putative glutamine transport system substrate-binding protein                                         | 36 | 20 | 16 | 0.00 | 1.00 | -0.96 | 0.028 | 0.55 |
| K03811 | nicotinamide mononucleotide transporter                                                               | 48 | 27 | 21 | 0.71 | 1.01 | -0.63 | 0.028 | 0.55 |
| K09764 | uncharacterized protein                                                                               | 48 | 27 | 21 | 1.22 | 0.94 | 0.47  | 0.028 | 0.55 |
| K15876 | cytochrome c nitrite reductase small subunit                                                          | 16 | 7  | 9  | 2.00 | 0.00 | 0.90  | 0.028 | 0.55 |
| K07812 | trimethylamine-N-oxide reductase (cytochrome c) [EC:1.7.2.3]                                          | 11 | 6  | 5  | 0.00 | 0.00 | -0.91 | 0.028 | 0.55 |
| K07705 | two-component system, LytT family, response regulator LytT                                            | 14 | 5  | 9  | 0.00 | 0.00 | -1.12 | 0.029 | 0.55 |
| K06861 | lipopolysaccharide export system ATP-binding protein [EC:3.6.3.-]                                     | 40 | 22 | 18 | 1.00 | 0.52 | 0.65  | 0.029 | 0.56 |
| K01966 | propionyl-CoA carboxylase beta chain [EC:6.4.1.3]                                                     | 43 | 24 | 19 | 0.50 | 1.00 | -0.73 | 0.029 | 0.56 |
| K13498 | indole-3-glycerol phosphate synthase / phosphoribosylanthranilate isomerase [EC:4.1.1.48 5.3.1.24]    | 46 | 26 | 20 | 0.75 | 1.22 | -0.62 | 0.030 | 0.56 |
| K07250 | 4-aminobutyrate aminotransferase / (S)-3-amino-2-methylpropionate transaminase [EC:2.6.1.19 2.6.1.22] | 46 | 25 | 21 | 0.21 | 0.85 | -0.75 | 0.031 | 0.56 |
| K05792 | tellurite resistance protein TerA                                                                     | 27 | 16 | 11 | 0.00 | 0.00 | -0.85 | 0.031 | 0.56 |
| K08138 | MFS transporter, SP family, xylose:H+ symporter                                                       | 48 | 27 | 21 | 1.30 | 0.92 | 0.46  | 0.031 | 0.56 |
| K01278 | dipeptidyl-peptidase 4 [EC:3.4.14.5]                                                                  | 35 | 20 | 15 | 1.00 | 0.29 | 0.89  | 0.031 | 0.56 |
| K14260 | alanine-synthesizing transaminase [EC:2.6.1.66 2.6.1.2]                                               | 42 | 24 | 18 | 0.48 | 0.33 | 0.61  | 0.031 | 0.56 |
| K02530 | DeoR family transcriptional regulator, lactose phosphotransferase system repressor                    | 39 | 23 | 16 | 0.66 | 0.33 | 0.82  | 0.032 | 0.56 |
| K07058 | membrane protein                                                                                      | 48 | 27 | 21 | 1.00 | 1.20 | -0.46 | 0.032 | 0.56 |
| K12940 | aminobenzoate-glutamate utilization protein A                                                         | 26 | 17 | 9  | 0.00 | 0.87 | -1.16 | 0.032 | 0.56 |
| K01739 | cystathionine gamma-synthase [EC:2.5.1.48]                                                            | 11 | 6  | 5  | 0.00 | 0.33 | -1.00 | 0.033 | 0.56 |
| K07115 | 23S rRNA (adenine2030-N6)-methyltransferase [EC:2.1.1.266]                                            | 16 | 11 | 5  | 1.30 | 1.35 | 1.28  | 0.033 | 0.56 |
| K08227 | MFS transporter, LPLT family, lysophospholipid transporter                                            | 35 | 19 | 16 | 0.67 | 0.84 | -0.75 | 0.033 | 0.56 |
| K09760 | DNA recombination protein Rmuc                                                                        | 48 | 27 | 21 | 1.01 | 0.89 | 0.44  | 0.033 | 0.56 |
| K01281 | X-Pro dipeptidyl-peptidase [EC:3.4.14.11]                                                             | 40 | 21 | 19 | 0.40 | 0.31 | -0.81 | 0.034 | 0.56 |
| K07794 | putative tricarboxylic transport membrane protein                                                     | 23 | 11 | 12 | 0.20 | 0.00 | -0.96 | 0.035 | 0.57 |
| K06418 | small acid-soluble spore protein A (major alpha-type SASP)                                            | 19 | 9  | 10 | 0.50 | 0.00 | 1.32  | 0.035 | 0.57 |
| K01372 | bleomycin hydrolase [EC:3.4.22.40]                                                                    | 47 | 26 | 21 | 1.10 | 0.73 | 0.55  | 0.035 | 0.57 |
| K01621 | xylulose-5-phosphate/fructose-6-phosphate phosphoketolase [EC:4.1.2.9 4.1.2.22]                       | 44 | 23 | 21 | 0.86 | 1.06 | -0.64 | 0.035 | 0.57 |
| K02972 | stationary-phase-induced ribosome-associated protein                                                  | 43 | 24 | 19 | 0.98 | 1.00 | -0.49 | 0.037 | 0.58 |
| K00897 | kanamycin kinase [EC:2.7.1.95]                                                                        | 27 | 15 | 12 | 0.00 | 0.31 | -0.89 | 0.037 | 0.58 |
| K06189 | magnesium and cobalt transporter                                                                      | 24 | 14 | 10 | 0.00 | 0.29 | -1.09 | 0.037 | 0.58 |
| K00121 | S-(hydroxymethyl)glutathione dehydrogenase / alcohol dehydrogenase [EC:1.1.1.284 1.1.1.1]             | 39 | 22 | 17 | 0.49 | 0.95 | -0.70 | 0.038 | 0.59 |
| K03299 | gluconate:H+ symporter, GntP family                                                                   | 48 | 27 | 21 | 1.13 | 1.42 | -0.40 | 0.038 | 0.59 |
| K00899 | 5-methylthioribose kinase [EC:2.7.1.100]                                                              | 46 | 26 | 20 | 1.67 | 0.75 | 0.51  | 0.038 | 0.59 |
| K04072 | acetaldehyde dehydrogenase / alcohol dehydrogenase [EC:1.2.1.10 1.1.1.1]                              | 47 | 27 | 20 | 0.94 | 1.00 | -0.36 | 0.038 | 0.59 |
| K04565 | superoxide dismutase, Cu-Zn family [EC:1.15.1.1]                                                      | 46 | 25 | 21 | 0.50 | 1.11 | -0.62 | 0.039 | 0.59 |
| K00098 | L-idonate 5-dehydrogenase [EC:1.1.1.264]                                                              | 45 | 26 | 19 | 0.50 | 1.00 | -0.56 | 0.039 | 0.59 |
| K09801 | uncharacterized protein                                                                               | 25 | 12 | 13 | 0.00 | 0.95 | -1.05 | 0.040 | 0.59 |
| K03462 | nicotinamide phosphoribosyltransferase [EC:2.4.2.12]                                                  | 28 | 16 | 12 | 0.00 | 0.36 | -0.85 | 0.040 | 0.59 |
| K17837 | metallo-beta-lactamase class B [EC:3.5.2.6]                                                           | 39 | 21 | 18 | 0.61 | 0.12 | 0.60  | 0.041 | 0.59 |
| K06221 | 2,5-diketo-D-gluconate reductase A [EC:1.1.1.346]                                                     | 47 | 27 | 20 | 0.71 | 0.95 | -0.44 | 0.041 | 0.59 |
| K14083 | trimethylamine--corrinoid protein Co-methyltransferase [EC:2.1.1.250]                                 | 31 | 17 | 14 | 0.33 | 0.88 | -0.65 | 0.042 | 0.59 |
| K18816 | aminoglycoside 6'-N-acetyltransferase I [EC:2.3.1.82]                                                 | 41 | 23 | 18 | 0.19 | 0.82 | -0.62 | 0.042 | 0.59 |
| K01354 | oligopeptidase B [EC:3.4.21.83]                                                                       | 29 | 18 | 11 | 0.03 | 0.31 | -0.99 | 0.042 | 0.59 |
| K06423 | small acid-soluble spore protein F (minor alpha/beta-type SASP)                                       | 48 | 27 | 21 | 0.96 | 0.79 | 0.30  | 0.042 | 0.59 |
| K01205 | alpha-N-acetylglucosaminidase [EC:3.2.1.50]                                                           | 48 | 27 | 21 | 0.66 | 0.67 | 0.60  | 0.042 | 0.59 |
| K00786 |                                                                                                       | 37 | 19 | 18 | 0.14 | 1.00 | -0.83 | 0.042 | 0.59 |
| K00428 | cytochrome c peroxidase [EC:1.11.1.5]                                                                 | 39 | 22 | 17 | 0.18 | 0.86 | -0.69 | 0.043 | 0.60 |
| K13922 | propionaldehyde dehydrogenase [EC:1.2.1.87]                                                           | 41 | 23 | 18 | 0.47 | 0.80 | -0.67 | 0.043 | 0.60 |
| K11618 | two-component system, NarI family, response regulator LiaR                                            | 23 | 11 | 12 | 0.00 | 0.50 | -0.99 | 0.044 | 0.60 |
| K02020 | molybdate transport system substrate-binding protein                                                  | 47 | 26 | 21 | 0.96 | 0.96 | -0.41 | 0.044 | 0.60 |
| K11927 | ATP-dependent RNA helicase RHIE [EC:3.6.4.13]                                                         | 45 | 26 | 19 | 1.06 | 0.54 | 0.64  | 0.044 | 0.60 |
| K03228 | type III secretion protein T                                                                          | 20 | 6  | 14 | 0.50 | 0.00 | -0.95 | 0.044 | 0.60 |
| K08234 | MFS transporter, YNFM family, putative membrane transport protein                                     | 12 | 6  | 6  | 0.00 | 0.00 | -1.48 | 0.046 | 0.60 |
| K12995 | rhamnosyl/mannosyltransferase [EC:2.4.1.-]                                                            | 48 | 27 | 21 | 0.92 | 1.21 | -0.49 | 0.046 | 0.60 |
| K03576 | LysR family transcriptional regulator, regulator for metE and meth                                    | 47 | 27 | 20 | 1.00 | 0.65 | 0.56  | 0.046 | 0.60 |
| K18284 | adenosylhomocysteine/aminooxyfuralosine nucleosidase [EC:3.2.2.9 3.2.2.30]                            | 14 | 7  | 7  | 1.00 | 0.00 | 0.83  | 0.046 | 0.60 |
| K09780 | uncharacterized protein                                                                               | 21 | 11 | 10 | 0.50 | 0.00 | 0.68  | 0.047 | 0.60 |
| K07712 | two-component system, NtrC family, nitrogen regulation response regulator GlnG                        | 40 | 21 | 19 | 0.76 | 0.75 | -0.77 | 0.048 | 0.60 |
| K03214 | RNA methyltransferase, TrmH family [EC:2.1.1.-]                                                       | 23 | 13 | 10 | 0.00 | 0.00 | -1.11 | 0.048 | 0.60 |
| K01247 | DNA 3-methyladenine glycosylase II [EC:3.2.2.21]                                                      | 48 | 27 | 21 | 0.75 | 1.02 | -0.51 | 0.048 | 0.60 |
| K11144 | primosomal protein Dnal                                                                               | 29 | 15 | 14 | 0.00 | 0.67 | -0.84 | 0.049 | 0.60 |
| K02103 | GntR family transcriptional regulator, arabinose operon transcriptional repressor                     | 45 | 26 | 19 | 0.55 | 1.15 | -0.55 | 0.049 | 0.60 |
| K00756 | pyrimidine-nucleoside phosphorylase [EC:2.4.2.2]                                                      | 48 | 27 | 21 | 0.91 | 1.57 | -0.42 | 0.049 | 0.60 |
| K01661 | naphthoate synthase [EC:4.1.3.36]                                                                     | 45 | 27 | 18 | 0.89 | 1.00 | -0.47 | 0.049 | 0.60 |
| K07347 | outer membrane usher protein                                                                          | 29 | 15 | 14 | 0.00 | 0.60 | -0.84 | 0.050 | 0.60 |
| K09936 | bacterial/archaeal transporter family-2 protein                                                       | 48 | 27 | 21 | 0.87 | 1.25 | -0.37 | 0.050 | 0.60 |
| K11214 | sedoheptulokinase [EC:2.7.1.14]                                                                       | 24 | 12 | 12 | 0.00 | 0.00 | -0.61 | 0.050 | 0.60 |

Calculated using linear mixed model adjusted for age and gender followed by correction for multiple testing by the Benjamini-Hochberg approach (n=48)

Table S9 Changes in prokaryotic families of carbohydrate active enzymes (CAZy)

| CAZy  | Known Activities                                                                                                        | Prevalence | Prevalence (WG>C) | Prevalence (C>WG) | Median fold change Wholegrain | Median fold change Control | Linear mixed model effect size | P-value | FDR-corrected P |
|-------|-------------------------------------------------------------------------------------------------------------------------|------------|-------------------|-------------------|-------------------------------|----------------------------|--------------------------------|---------|-----------------|
| GH6   | endoglucanase (EC 3.2.1.4); cellobiohydrolase (EC 3.2.1.91)                                                             | 44         | 25                | 19                | 0.98                          | 1.08                       | -0.67                          | 0.019   | 0.28            |
| GH22  | lysozyme type C (EC 3.2.1.17); lysozyme type I (EC 3.2.1.17); $\alpha$ -lactalbumin                                     | 48         | 27                | 21                | 1.08                          | 1.01                       | 0.42                           | 0.022   | 0.28            |
| GH79  | $\beta$ -glucuronidase (EC 3.2.1.31); hyaluronoglucuronidase (EC 3.2.1.36); heparanase (EC 3.2.1.166)                   | 48         | 27                | 21                | 1.05                          | 0.72                       | 0.38                           | 0.025   | 0.28            |
| GH111 | keratan sulfate hydrolase (endo- $\beta$ -N-acetylglucosaminidase) (EC 3.2.1.-)                                         | 48         | 27                | 21                | 1.05                          | 1.08                       | 0.24                           | 0.030   | 0.28            |
| GT25  | lipopolysaccharide $\beta$ -1,4-galactosyltransferase (EC 2.4.1.-); $\beta$ -1,3-glucosyltransferase (EC 2.4.1.-)       | 48         | 27                | 21                | 0.94                          | 1.13                       | -0.30                          | 0.036   | 0.28            |
| GT22  | Dol-P-Man: Man6GlcNAc2-PP-Dol $\alpha$ -1,2-mannosyltransferase (EC 2.4.1.259); Dol-P-Man: Man8                         | 48         | 27                | 21                | 0.96                          | 1.12                       | -0.43                          | 0.041   | 0.28            |
| GT23  | N-acetyl- $\beta$ -D-glucosaminide $\alpha$ -1,6-L-fucosyltransferase (EC 2.4.1.68); chitin-oligosaccharide $\alpha$ -1 | 48         | 27                | 21                | 0.93                          | 1.18                       | -0.38                          | 0.044   | 0.28            |
| GH44  | endoglucanase (EC 3.2.1.4); xyloglucanase (EC 3.2.1.151)                                                                | 48         | 27                | 21                | 1.29                          | 0.91                       | 0.51                           | 0.045   | 0.28            |
| GT82  | UDP-GalNAc: $\beta$ -1,4-N-acetylgalactosaminyltransferase (EC 2.4.1.-)                                                 | 48         | 27                | 21                | 0.99                          | 0.85                       | 0.30                           | 0.047   | 0.28            |
| GH75  | chitosanase (EC 3.2.1.132)                                                                                              | 48         | 27                | 21                | 1.09                          | 0.90                       | 0.30                           | 0.047   | 0.28            |

Calculated using linear mixed model adjusted for age and gender followed by correction for multiple testing by the Benjamini-Hochberg approach (n=48)

**Table S10A Changes in gut microbiota at phylum level assessed by 16S rRNA gene sequencing**

| Phylum            | P-value | FDR-corrected P | Linear mixed model effect size |
|-------------------|---------|-----------------|--------------------------------|
| p_Verrucomicrobia | 0.22    | 0.82            | 0.67                           |
| p_Lentisphaerae   | 0.29    | 0.82            | 0.40                           |
| p_Proteobacteria  | 0.43    | 0.82            | -0.21                          |
| p_Fusobacteria    | 0.44    | 0.82            | 0.21                           |
| p_Actinobacteria  | 0.64    | 0.82            | -0.09                          |
| p_Cyanobacteria   | 0.66    | 0.82            | 0.15                           |
| p_Firmicutes      | 0.68    | 0.82            | -0.01                          |
| p_Euryarchaeota   | 0.71    | 0.82            | 0.20                           |
| p_Bacteroidetes   | 0.74    | 0.82            | 0.09                           |
| p_Tenericutes     | 0.75    | 0.82            | 0.14                           |
| p_TM7             | 0.96    | 0.96            | -0.01                          |

Calculated using linear mixed model adjusted for age and gender followed by correction for multiple testing by the Benjamini-Hochberg approach (n=48)

**Table S10B Changes in gut microbiota at class level assessed by 16S rRNA gene sequencing**

| Class             | P-value | FDR-corrected P | Linear mixed model effect size |
|-------------------|---------|-----------------|--------------------------------|
| c_Sphingobacteria | 0.01    | 0.28            | 0.61                           |

Calculated using linear mixed model adjusted for age and gender followed by correction for multiple testing by the Benjamini-Hochberg approach (n=48)

**Table S10C Changes in gut microbiota at order level assessed by 16S rRNA gene sequencing**

| Order                | P-value | FDR-corrected P | Linear mixed model effect size |
|----------------------|---------|-----------------|--------------------------------|
| o_Sphingobacteriales | 0.01    | 0.44            | 0.61                           |

Calculated using linear mixed model adjusted for age and gender followed by correction for multiple testing by the Benjamini-Hochberg approach (n=48)

**Table S10D Changes in gut microbiota at family level assessed by 16S rRNA gene sequencing**

| Family                | P-value | FDR-corrected P | Linear mixed model effect size |
|-----------------------|---------|-----------------|--------------------------------|
| f_Sphingobacteriaceae | 0.013   | 0.47            | 0.61                           |
| f_Corynebacteriaceae  | 0.017   | 0.47            | -0.71                          |

Calculated using linear mixed model adjusted for age and gender followed by correction for multiple testing by the Benjamini-Hochberg approach (n=48)

**Table S10E Changes in gut microbiota at genus level assessed by 16S rRNA gene sequencing**

| Genus             | P-value | FDR-corrected P | Linear mixed model effect size |
|-------------------|---------|-----------------|--------------------------------|
| g_Corynebacterium | 0.017   | 0.75            | -0.71                          |
| g_Pedobacter      | 0.020   | 0.75            | 0.63                           |
| g_Ruminococcus    | 0.026   | 0.75            | -0.49                          |
| g_Eggerthella     | 0.041   | 0.85            | -0.54                          |

Calculated using linear mixed model adjusted for age and gender followed by correction for multiple testing by the Benjamini-Hochberg approach (n=48)

**Table S10F Changes in gut microbiota at OTU level assessed by 16S rRNA gene sequencing**

| OTU ID   | Taxonomy                                                                                                                     | P-value | FDR-corrected P | Linear mixed model effect size |
|----------|------------------------------------------------------------------------------------------------------------------------------|---------|-----------------|--------------------------------|
| OTU_879  | k_Bacteria; p_Firmicutes; c_Clostridia; o_Clostridiales; f_Clostridiaceae; g_ ; s_                                           | 0.0001  | 0.09            | -1.09                          |
| OTU_74   | k_Bacteria; p_Firmicutes; c_Clostridia; o_Clostridiales; f_Ruminococcaceae; g_ ; s_                                          | 0.001   | 0.35            | -0.97                          |
| OTU_2727 | k_Bacteria; p_Proteobacteria; c_Betaproteobacteria; o_Burkholderiales; f_Alcaligenaceae; g_Sutterella; s_                    | 0.002   | 0.35            | 1.15                           |
| OTU_1362 | k_Bacteria; p_Firmicutes; c_Clostridia; o_Clostridiales; f_Ruminococcaceae; g_ ; s_                                          | 0.002   | 0.35            | 0.62                           |
| OTU_2209 | k_Bacteria; p_Firmicutes; c_Clostridia; o_Clostridiales; f_Lachnospiraceae; g_ ; s_                                          | 0.003   | 0.35            | 0.69                           |
| OTU_1325 | k_Bacteria; p_Firmicutes; c_Clostridia; o_Clostridiales; f_Lachnospiraceae; g_Blaulia; s_                                    | 0.003   | 0.35            | 0.83                           |
| OTU_421  | k_Bacteria; p_Firmicutes; c_Clostridia; o_Clostridiales; f_Ruminococcaceae; g_ ; s_                                          | 0.003   | 0.35            | -0.67                          |
| OTU_78   | k_Bacteria; p_Firmicutes; c_Clostridia; o_Clostridiales; f_Ruminococcaceae; g_Oscillospira; s_                               | 0.003   | 0.35            | 1.13                           |
| OTU_614  | k_Bacteria; p_Firmicutes; c_Clostridia; o_Clostridiales; f_Ruminococcaceae; g_Oscillospira; s_                               | 0.003   | 0.35            | 0.87                           |
| OTU_1114 | k_Bacteria; p_Bacteroidetes; c_Sphingobacteria; o_Sphingobacteriales; f_Sphingobacteriaceae; g_Pedobacter; s_                | 0.004   | 0.38            | 0.74                           |
| OTU_925  | k_Bacteria; p_Actinobacteria; c_Actinobacteria; o_Bifidobacteriales; f_Bifidobacteriaceae; g_Bifidobacterium; s_longum       | 0.005   | 0.41            | 0.66                           |
| OTU_1048 | k_Bacteria; p_Firmicutes; c_Clostridia; o_Clostridiales; f_Ruminococcaceae; g_ ; s_                                          | 0.006   | 0.41            | 0.62                           |
| OTU_742  | k_Bacteria; p_Firmicutes; c_Clostridia; o_Clostridiales; f_Ruminococcaceae; g_ ; s_                                          | 0.006   | 0.41            | 0.72                           |
| OTU_923  | k_Bacteria; p_Firmicutes; c_Clostridia; o_Clostridiales; f_Lachnospiraceae; g_Coprococcus; s_                                | 0.007   | 0.41            | -0.59                          |
| OTU_477  | k_Bacteria; p_Firmicutes; c_Clostridia; o_Clostridiales; f_Ruminococcaceae; g_Oscillospira; s_                               | 0.007   | 0.41            | -0.81                          |
| OTU_439  | k_Bacteria; p_Firmicutes; c_Clostridia; o_Clostridiales; f_Ruminococcaceae; g_ ; s_                                          | 0.008   | 0.46            | -0.73                          |
| OTU_592  | k_Bacteria; p_Verrucomicrobia; c_Verrucomicrobiae; o_Verrucomicrobiales; f_Verrucomicrobiaceae; g_Akkermansia; s_muciniphila | 0.008   | 0.46            | 0.83                           |
| OTU_448  | k_Bacteria; p_Firmicutes; c_Clostridia; o_Clostridiales; f_ ; g_ ; s_                                                        | 0.011   | 0.52            | 0.49                           |
| OTU_850  | k_Bacteria; p_Firmicutes; c_Clostridia; o_Clostridiales; f_Ruminococcaceae; g_ ; s_                                          | 0.011   | 0.52            | -0.58                          |
| OTU_2648 | k_Bacteria; p_Firmicutes; c_Clostridia; o_Clostridiales; f_Lachnospiraceae; g_ ; s_                                          | 0.014   | 0.64            | 0.71                           |
| OTU_142  | k_Bacteria; p_Firmicutes; c_Clostridia; o_Clostridiales; f_Lachnospiraceae; g_ ; s_                                          | 0.016   | 0.64            | 0.65                           |
| OTU_1409 | k_Bacteria; p_Firmicutes; c_Clostridia; o_Clostridiales; f_Lachnospiraceae; g_Coprococcus; s_                                | 0.017   | 0.64            | 0.50                           |
| OTU_956  | k_Bacteria; p_Actinobacteria; c_Actinobacteria; o_Bifidobacteriales; f_Bifidobacteriaceae; g_Bifidobacterium; s_             | 0.018   | 0.64            | -0.70                          |
| OTU_226  | k_Bacteria; p_Firmicutes; c_Clostridia; o_Clostridiales; f_Ruminococcaceae; g_ ; s_                                          | 0.018   | 0.64            | 0.72                           |
| OTU_1207 | k_Bacteria; p_Verrucomicrobia; c_Verrucomicrobiae; o_Verrucomicrobiales; f_Verrucomicrobiaceae; g_Akkermansia; s_muciniphila | 0.018   | 0.64            | 0.82                           |
| OTU_34   | k_Bacteria; p_Firmicutes; c_Bacilli; o_Lactobacillales; f_Streptococcaceae; g_Streptococcus; s_                              | 0.018   | 0.64            | -0.81                          |
| OTU_551  | k_Bacteria; p_Firmicutes; c_Clostridia; o_Clostridiales; f_ ; g_ ; s_                                                        | 0.019   | 0.64            | 0.92                           |
| OTU_401  | k_Bacteria; p_Firmicutes; c_Clostridia; o_Clostridiales; f_Ruminococcaceae; g_ ; s_                                          | 0.020   | 0.64            | -0.62                          |
| OTU_42   | k_Bacteria; p_Firmicutes; c_Clostridia; o_Clostridiales; f_Clostridiaceae; g_ ; s_                                           | 0.021   | 0.65            | -0.83                          |
| OTU_205  | k_Bacteria; p_Firmicutes; c_Clostridia; o_Clostridiales; f_Ruminococcaceae; g_Ruminococcus; s_                               | 0.022   | 0.65            | -0.81                          |
| OTU_945  | k_Bacteria; p_Firmicutes; c_Clostridia; o_Clostridiales; f_Ruminococcaceae; g_ ; s_                                          | 0.022   | 0.65            | -0.52                          |
| OTU_224  | k_Bacteria; p_Firmicutes; c_Clostridia; o_Clostridiales; f_ ; g_ ; s_                                                        | 0.024   | 0.65            | 0.75                           |
| OTU_670  | k_Bacteria; p_Bacteroidetes; c_Sphingobacteria; o_Sphingobacteriales; f_Sphingobacteriaceae; g_Sphingobacterium; s_          | 0.024   | 0.65            | 0.54                           |
| OTU_1892 | k_Bacteria; p_Verrucomicrobia; c_Verrucomicrobiae; o_Verrucomicrobiales; f_Verrucomicrobiaceae; g_Akkermansia; s_muciniphila | 0.026   | 0.65            | 0.72                           |
| OTU_2488 | k_Bacteria; p_Firmicutes; c_Erysipelotrichi; o_Erysipelotrichales; f_Erysipelotrichaceae; g_ ; s_                            | 0.026   | 0.65            | 0.42                           |
| OTU_632  | k_Bacteria; p_Firmicutes; c_Clostridia; o_Clostridiales; f_Lachnospiraceae; g_Coprococcus; s_                                | 0.027   | 0.65            | -0.86                          |
| OTU_1907 | k_Bacteria; p_Firmicutes; c_Clostridia; o_Clostridiales; f_Ruminococcaceae; g_ ; s_                                          | 0.027   | 0.65            | -0.44                          |
| OTU_312  | k_Bacteria; p_Firmicutes; c_Clostridia; o_Clostridiales; f_Clostridiaceae; g_ ; s_                                           | 0.028   | 0.65            | -0.77                          |
| OTU_157  | k_Bacteria; p_Firmicutes; c_Erysipelotrichi; o_Erysipelotrichales; f_Erysipelotrichaceae; g_ ; s_                            | 0.029   | 0.65            | -0.82                          |
| OTU_423  | k_Bacteria; p_Firmicutes; c_Clostridia; o_Clostridiales; f_Lachnospiraceae; g_ ; s_                                          | 0.030   | 0.65            | -0.89                          |
| OTU_201  | k_Bacteria; p_Firmicutes; c_Clostridia; o_Clostridiales; f_ ; g_ ; s_                                                        | 0.030   | 0.65            | 1.01                           |
| OTU_986  | k_Bacteria; p_Firmicutes; c_Clostridia; o_Clostridiales; f_Ruminococcaceae; g_Oscillospira; s_                               | 0.031   | 0.65            | -0.42                          |
| OTU_2394 | k_Bacteria; p_Firmicutes; c_Erysipelotrichi; o_Erysipelotrichales; f_Erysipelotrichaceae; g_ ; s_                            | 0.032   | 0.65            | 0.47                           |
| OTU_2116 | k_Bacteria; p_Firmicutes; c_Clostridia; o_Clostridiales; f_Lachnospiraceae; g_ ; s_                                          | 0.032   | 0.65            | 0.41                           |
| OTU_2088 | k_Bacteria; p_Firmicutes; c_Clostridia; o_Clostridiales; f_Ruminococcaceae; g_ ; s_                                          | 0.032   | 0.65            | -0.47                          |
| OTU_446  | k_Bacteria; p_Firmicutes; c_Clostridia; o_Clostridiales; f_ ; g_ ; s_                                                        | 0.033   | 0.65            | -0.61                          |
| OTU_1    | k_Bacteria; p_Firmicutes; c_Clostridia; o_Clostridiales; f_Lachnospiraceae; g_ ; s_                                          | 0.034   | 0.66            | 0.44                           |
| OTU_2753 | k_Bacteria; p_Firmicutes; c_Clostridia; o_Clostridiales; f_Ruminococcaceae; g_ ; s_                                          | 0.036   | 0.68            | 0.54                           |
| OTU_2661 | k_Bacteria; p_Firmicutes; c_Clostridia; o_Clostridiales; f_ ; g_ ; s_                                                        | 0.037   | 0.69            | 0.51                           |
| OTU_378  | k_Bacteria; p_Firmicutes; c_Clostridia; o_Clostridiales; f_Ruminococcaceae; g_ ; s_                                          | 0.039   | 0.69            | -0.54                          |
| OTU_462  | k_Bacteria; p_Firmicutes; c_Erysipelotrichi; o_Erysipelotrichales; f_Erysipelotrichaceae; g_ ; s_                            | 0.039   | 0.69            | 1.45                           |
| OTU_224  | k_Bacteria; p_Firmicutes; c_Clostridia; o_Clostridiales; f_Ruminococcaceae; g_Ruminococcus                                   | 0.039   | 0.69            | -0.92                          |
| OTU_38   | k_Bacteria; p_Bacteroidetes; c_Bacteroidia; o_Bacteroidales; f_Bacteroidaceae; g_Bacteroides; s_fragilis                     | 0.040   | 0.69            | -0.78                          |
| OTU_27   | k_Bacteria; p_Firmicutes; c_Clostridia; o_Clostridiales; f_Lachnospiraceae; g_Coprococcus; s_eutactus                        | 0.042   | 0.70            | 0.98                           |
| OTU_1291 | k_Bacteria; p_Proteobacteria; c_Gammaproteobacteria; o_Pseudomonadales; f_Moraxellaceae; g_Acinetobacter; s_johnsonii        | 0.042   | 0.70            | 0.87                           |
| OTU_400  | k_Bacteria; p_Firmicutes; c_Clostridia; o_Clostridiales; f_Ruminococcaceae; g_Anaerotruncus; s_                              | 0.044   | 0.72            | -0.64                          |
| OTU_267  | k_Bacteria; p_Proteobacteria; c_Betaproteobacteria; o_Burkholderiales; f_Alcaligenaceae; g_Sutterella; s_                    | 0.046   | 0.72            | 1.54                           |
| OTU_2559 | k_Bacteria; p_Firmicutes; c_Clostridia; o_Clostridiales; f_Lachnospiraceae; g_Coprococcus; s_                                | 0.046   | 0.72            | 0.44                           |
| OTU_1967 | k_Bacteria; p_Firmicutes; c_Clostridia; o_Clostridiales; f_Ruminococcaceae; g_ ; s_                                          | 0.047   | 0.72            | -0.57                          |
| OTU_488  | k_Bacteria; p_Firmicutes; c_Clostridia; o_Clostridiales; f_Christensenellaceae; g_ ; s_                                      | 0.048   | 0.72            | -0.57                          |
| OTU_540  | k_Bacteria; p_Proteobacteria; c_Gammaproteobacteria; o_Pseudomonadales; f_Moraxellaceae; g_Enhydrobacter; s_                 | 0.049   | 0.72            | 0.86                           |
| OTU_517  | k_Bacteria; p_Firmicutes; c_Clostridia; o_Clostridiales; f_Ruminococcaceae; g_ ; s_                                          | 0.049   | 0.72            | -0.46                          |

Calculated using linear mixed model adjusted for age and gender followed by correction for multiple testing by the Benjamini-Hochberg approach (n=48)

Table S11 Associations between metagenomic species and wholegrain intake, fibre intake, serum IL-6 concentrations and serum CRP concentrations.

| MGS         | Taxonomical annotation             | Association to wholegrain intake |                 | Association to fibre intake |                 | Association to serum IL-6 |                 | Association to serum CRP |             |
|-------------|------------------------------------|----------------------------------|-----------------|-----------------------------|-----------------|---------------------------|-----------------|--------------------------|-------------|
|             |                                    | Effect size                      | FDR P-value     | Effect size                 | FDR P-value     | Effect size               | FDR P-value     | Effect size              | FDR P-value |
| MGS:igc654  | Clostridiales                      | 0.20                             | <b>5.84E-04</b> | 0.72                        | <b>1.59E-02</b> | -0.03                     | 9.35E-01        | 0.04                     | 9.29E-01    |
| MGS:igc102  | Erysipelatoclostridium ramosum     | -0.20                            | <b>1.82E-03</b> | -0.30                       | 3.23E-01        | 0.44                      | <b>3.86E-02</b> | 0.10                     | 9.15E-01    |
| MGS:igc460  | Clostridiales                      | -0.11                            | 7.23E-02        | -0.31                       | 2.96E-01        | -0.03                     | 9.35E-01        | 0.06                     | 9.29E-01    |
| MGS:igc633  | Clostridiales                      | 0.11                             | 1.41E-01        | 0.47                        | 2.14E-01        | -0.15                     | 8.40E-01        | 0.03                     | 9.72E-01    |
| MGS:igc139  | Ruminococcus                       | -0.21                            | <b>2.64E-02</b> | -0.78                       | 8.04E-02        | 0.08                      | 8.89E-01        | 0.09                     | 9.29E-01    |
| MGS:igc291  | Faecalibacterium prausnitzii       | 0.17                             | <b>1.71E-03</b> | 0.53                        | <b>3.45E-02</b> | -0.13                     | 8.40E-01        | -0.01                    | 9.72E-01    |
| MGS:igc359  | Clostridiales                      | 0.15                             | 1.37E-01        | 1.05                        | <b>3.45E-02</b> | -0.40                     | 5.02E-01        | -0.27                    | 7.29E-01    |
| MGS:igc309  | Ruminococcus lactaris              | 0.25                             | <b>8.29E-03</b> | 0.26                        | 5.91E-01        | -0.22                     | 8.40E-01        | -0.11                    | 9.29E-01    |
| MGS:igc734  | Streptococcus thermophilus         | -0.21                            | 5.40E-02        | -0.10                       | 7.84E-01        | -0.19                     | 8.40E-01        | 0.18                     | 7.29E-01    |
| MGS:igc584  | Holdemanella biformis              | -0.11                            | <b>1.15E-02</b> | -0.25                       | 2.75E-01        | 0.05                      | 8.89E-01        | 0.01                     | 9.72E-01    |
| MGS:igc517  | Faecalibacterium prausnitzii       | 0.14                             | <b>4.66E-02</b> | 0.34                        | 2.94E-01        | -0.04                     | 9.22E-01        | 0.03                     | 9.72E-01    |
| MGS:igc171  | Faecalibacterium prausnitzii       | 0.10                             | 8.71E-02        | 0.44                        | 1.11E-01        | 0.01                      | 9.76E-01        | 0.04                     | 9.29E-01    |
| MGS:igc213  | Coprococcus                        | 0.20                             | <b>3.81E-02</b> | 0.47                        | 3.06E-01        | -0.34                     | 5.02E-01        | -0.17                    | 8.74E-01    |
| MGS:igc9    | Bacteroides thetaiotaomicron       | -0.16                            | <b>1.71E-03</b> | -0.51                       | <b>3.45E-02</b> | 0.08                      | 8.40E-01        | 0.00                     | 9.98E-01    |
| MGS:igc263  | Prevotella copri                   | 0.05                             | 5.01E-01        | 0.45                        | 2.14E-01        | -0.13                     | 8.40E-01        | -0.08                    | 9.29E-01    |
| MGS:igc292  | Faecalibacterium prausnitzii       | 0.19                             | <b>3.09E-03</b> | 0.71                        | <b>2.63E-02</b> | -0.08                     | 8.40E-01        | -0.02                    | 9.72E-01    |
| MGS:igc157  | Clostridiales                      | -0.10                            | 6.16E-02        | -0.24                       | 3.34E-01        | 0.05                      | 8.89E-01        | 0.02                     | 9.72E-01    |
| MGS:igc762  | Clostridiales                      | -0.14                            | <b>2.98E-02</b> | -0.36                       | 2.76E-01        | 0.22                      | 5.58E-01        | 0.16                     | 7.29E-01    |
| MGS:igc1140 | Bacteria                           | 0.15                             | 1.08E-01        | 0.69                        | 1.34E-01        | 0.04                      | 9.35E-01        | -0.01                    | 9.89E-01    |
| MGS:igc784  | Clostridiales bacterium 1_7_47FAA  | -0.15                            | <b>1.09E-02</b> | -0.26                       | 3.34E-01        | 0.10                      | 8.40E-01        | 0.05                     | 9.29E-01    |
| MGS:igc613  | Clostridiales                      | 0.14                             | <b>2.55E-03</b> | 0.54                        | <b>2.63E-02</b> | -0.07                     | 8.40E-01        | 0.04                     | 9.29E-01    |
| MGS:igc89   | Subdoligranulum sp. 4_3_54A2FAA    | -0.21                            | <b>5.84E-04</b> | -0.69                       | <b>2.63E-02</b> | 0.22                      | 5.02E-01        | 0.08                     | 9.15E-01    |
| MGS:igc886  | Erysipelotrichaceae                | 0.03                             | 6.46E-01        | 0.09                        | 7.42E-01        | -0.47                     | <b>2.24E-02</b> | -0.14                    | 7.29E-01    |
| MGS:igc389  | Clostridiales                      | 0.12                             | <b>3.81E-02</b> | 0.09                        | 7.42E-01        | -0.07                     | 8.40E-01        | -0.13                    | 7.29E-01    |
| MGS:igc763  | Clostridiales                      | -0.06                            | 3.68E-01        | -0.29                       | 3.16E-01        | 0.12                      | 8.40E-01        | -0.07                    | 9.29E-01    |
| MGS:igc745  | Streptococcus salivarius           | -0.05                            | 4.09E-01        | 0.13                        | 6.17E-01        | -0.05                     | 8.89E-01        | 0.08                     | 9.15E-01    |
| MGS:igc1203 | Bacteria                           | 0.22                             | <b>5.92E-03</b> | 0.61                        | 1.14E-01        | -0.30                     | 5.02E-01        | -0.16                    | 8.28E-01    |
| MGS:igc318  | Bacteria                           | -0.21                            | <b>1.47E-02</b> | -0.70                       | 8.47E-02        | -0.30                     | 5.02E-01        | -0.14                    | 9.15E-01    |
| MGS:igc1259 | Eukaryota                          | -0.10                            | 2.56E-01        | -0.76                       | 8.04E-02        | -0.18                     | 8.40E-01        | -0.27                    | 6.38E-01    |
| MGS:igc818  | Clostridiales                      | -0.05                            | 3.68E-01        | -0.30                       | 2.90E-01        | 0.02                      | 9.39E-01        | -0.07                    | 9.29E-01    |
| MGS:igc938  | Firmicutes                         | 0.11                             | 9.66E-02        | 0.30                        | 3.34E-01        | -0.01                     | 9.76E-01        | -0.01                    | 9.72E-01    |
| MGS:igc64   | Clostridiales                      | -0.02                            | 6.63E-01        | -0.13                       | 5.91E-01        | 0.00                      | 9.76E-01        | -0.03                    | 9.29E-01    |
| MGS:igc100  | Bacteroides                        | -0.06                            | 1.97E-01        | -0.06                       | 7.74E-01        | -0.03                     | 9.20E-01        | -0.01                    | 9.72E-01    |
| MGS:igc732  | butyrate-producing bacterium SS3/4 | 0.20                             | <b>5.92E-03</b> | 0.51                        | 1.28E-01        | -0.22                     | 5.58E-01        | -0.09                    | 9.15E-01    |
| MGS:igc24   | Bacteroides                        | -0.09                            | 6.41E-02        | -0.56                       | <b>2.63E-02</b> | 0.13                      | 8.40E-01        | -0.01                    | 9.72E-01    |
| MGS:igc691  | Lachnospiraceae                    | 0.02                             | 8.34E-01        | 0.29                        | 4.38E-01        | -0.44                     | 1.25E-01        | -0.34                    | 1.57E-01    |
| MGS:igc1200 | Blautia                            | -0.11                            | 9.64E-02        | -0.41                       | 2.42E-01        | -0.03                     | 9.35E-01        | 0.01                     | 9.72E-01    |
| MGS:igc347  | Bacteroidales                      | -0.08                            | 1.07E-01        | -0.33                       | 2.19E-01        | -0.06                     | 8.40E-01        | 0.04                     | 9.29E-01    |
| MGS:igc1207 | Clostridiales                      | -0.19                            | 5.41E-02        | -0.99                       | <b>3.45E-02</b> | 0.58                      | <b>3.86E-02</b> | 0.21                     | 7.29E-01    |
| MGS:igc54   | [Clostridium] citroniae            | -0.13                            | 7.92E-02        | -0.09                       | 7.74E-01        | 0.06                      | 8.98E-01        | -0.11                    | 9.15E-01    |
| MGS:igc351  | Clostridiales                      | 0.28                             | <b>3.60E-03</b> | 0.55                        | 2.53E-01        | 0.18                      | 8.40E-01        | 0.08                     | 9.29E-01    |
| MGS:igc640  | Intestinimonas sp. GD2             | -0.02                            | 7.95E-01        | -0.02                       | 9.54E-01        | 0.34                      | 5.02E-01        | -0.04                    | 9.72E-01    |
| MGS:igc199  | Clostridiales                      | -0.01                            | 8.79E-01        | 0.22                        | 4.83E-01        | 0.11                      | 8.40E-01        | 0.06                     | 9.29E-01    |
| MGS:igc301  | Tyzzerella nexilis                 | -0.18                            | 7.20E-02        | -1.03                       | <b>2.63E-02</b> | 0.71                      | <b>1.01E-02</b> | 0.36                     | 2.47E-01    |
| MGS:igc801  | Bacteria                           | 0.06                             | 3.05E-01        | 0.16                        | 5.51E-01        | -0.17                     | 6.44E-01        | -0.05                    | 9.29E-01    |
| MGS:igc758  | Bifidobacterium dentium            | -0.12                            | <b>3.98E-02</b> | -0.50                       | 8.04E-02        | 0.09                      | 8.40E-01        | 0.04                     | 9.29E-01    |
| MGS:igc511  | Dorea formicigenerans              | 0.02                             | 7.17E-01        | 0.11                        | 6.17E-01        | -0.21                     | 4.48E-01        | -0.09                    | 8.28E-01    |
| MGS:igc281  | Bacteria                           | -0.05                            | 2.81E-01        | -0.12                       | 6.17E-01        | 0.10                      | 8.40E-01        | -0.06                    | 9.29E-01    |
| MGS:igc169  | Anaerostipes hadrus                | 0.02                             | 7.32E-01        | 0.43                        | 1.53E-01        | -0.24                     | 5.02E-01        | -0.18                    | 6.38E-01    |
| MGS:igc749  | Coprococcus eutactus               | 0.18                             | <b>6.86E-03</b> | 0.56                        | 8.47E-02        | -0.11                     | 8.40E-01        | -0.13                    | 8.28E-01    |
| MGS:igc832  | Senegalimassilia anaerobia         | -0.04                            | 4.01E-01        | -0.08                       | 7.42E-01        | -0.04                     | 8.40E-01        | 0.03                     | 9.29E-01    |

Calculated using linear mixed model adjusted for age and gender followed by correction for multiple testing by the Benjamini-Hochberg approach (n=48)

**Table S12 Effects of the wholegrain and refined grain diet on plasma short-chain fatty acids**

| Metabolite                                         | Refined grain                                          |                   | Wholegrain                                             |                   | P-value <sup>1</sup> |
|----------------------------------------------------|--------------------------------------------------------|-------------------|--------------------------------------------------------|-------------------|----------------------|
|                                                    | Median (25 <sup>th</sup> -75 <sup>th</sup> percentile) |                   | Median (25 <sup>th</sup> -75 <sup>th</sup> percentile) |                   |                      |
|                                                    | Baseline                                               | End               | Baseline                                               | End               |                      |
| Acetic acid<br>( $\mu\text{mol/L}$ )               | 71.4 (55.2-97.1)                                       | 73.3 (59.6-111.5) | 76.4 (55.9-103.5)                                      | 81.5 (62.3-109.2) | 0.96                 |
| Propionic acid<br>( $\mu\text{mol/L}$ )            | 3.90 (3.26-4.67)                                       | 3.67 (3.28-4.35)  | 3.76 (3.24-4.66)                                       | 3.77 (3.33-4.57)  | 0.47                 |
| Butyric acid <sup>2</sup><br>( $\mu\text{mol/L}$ ) | 0.49 (0.40-0.78)                                       | 0.54 (0.40-0.71)  | 0.55 (0.37-0.70)                                       | 0.65 (0.42-0.92)  | 0.14                 |
| Isobutyric acid<br>( $\mu\text{mol/L}$ )           | 1.25 (0.72-1.41)                                       | 1.25 (0.74-1.37)  | 1.04 (0.73-1.39)                                       | 1.19 (0.77-1.37)  | 0.44                 |
| Isovaleric acid<br>( $\mu\text{mol/L}$ )           | 0.45 (0.35-0.55)                                       | 0.45 (0.35-0.54)  | 0.42 (0.32-0.55)                                       | 0.47 (0.34-0.58)  | 0.26                 |
| Valeric acid<br>( $\mu\text{mol/L}$ )              | 0.09 (0.06-0.12)                                       | 0.08 (0.06-0.11)  | 0.09 (0.07-0.11)                                       | 0.08 (0.07-0.11)  | 0.31                 |
| Caproic acid<br>( $\mu\text{mol/L}$ )              | 0.50 (0.40-0.56)                                       | 0.47 (0.39-0.54)  | 0.48 (0.42-0.56)                                       | 0.50 (0.39-0.54)  | 0.97                 |

<sup>1</sup>Linear mixed model adjusting for age and gender (n=50).

<sup>2</sup>We noted that a comparison of the treatment groups at end of the periods indicated higher plasma concentrations of butyrate after the wholegrain intervention as compared to the refined grain intervention (Paired t-test; P=0.022).

**Table S13** List of urinary metabolites differing between the whole-grain and refined grain interventions identified by UPLC-MS and GC-MS

| Technique | Tentative structural assignment | ID level <sup>a</sup> | Adduct                                | Retention time (min) | Experimental m/z | MS/MS fragmentation m/z                                                                                 | Authentic standard m/z                         | Database m/z | Mass error (mDa) |
|-----------|---------------------------------|-----------------------|---------------------------------------|----------------------|------------------|---------------------------------------------------------------------------------------------------------|------------------------------------------------|--------------|------------------|
| UPLC-MS   | Pyrocatechol-O-glucuronide      | 1                     | [M+NH <sub>4</sub> ] <sup>+</sup>     | 1.3                  | 304.1025         | 199.1697, 141.0177, 111.1166                                                                            | 111.044<br>Pyrocatechol<br>[M+H] <sup>+</sup>  | 304.1027     | 0.2              |
| UPLC-MS   | 2-aminophenol-sulphate          | 1                     | [M-H] <sup>-</sup>                    | 1.5                  | 188.0021         | 129.0190, 108.0454 [M-H-SO <sub>3</sub> ] <sup>-</sup> , 79.9584 [SO <sub>3</sub> ] <sup>-</sup>        |                                                | 188.0012     | 0.9              |
|           |                                 |                       | [M+H] <sup>+</sup>                    | 1.5                  | 190.0167         | 110.0600 [M+H-sulphate] <sup>+</sup> (2-aminophenol)                                                    | 110.06<br>2-aminophenol<br>[M+H] <sup>+</sup>  | 190.0169     | 0.2              |
| UPLC-MS   | Pyrocatechol-sulphate           | 1                     | [M-H] <sup>-</sup>                    | 1.6                  | 188.9861         | 170.0438, 109.0300 [M-H-sulphate] <sup>-</sup>                                                          | 109.0299<br>Pyrocatechol<br>[M-H] <sup>-</sup> | 188.9852     | 0.9              |
| UPLC-MS   | DHPPA-glucuronide               | 1                     | [M-H] <sup>-</sup>                    | 3.2                  | 357.0816         | 310.1161, 181.0484 [M-H-glucuronide] <sup>-</sup> , 175.0245, 137.0601, 113.0244 (glucuronide), 95.0143 | 181.0501<br>DHPPA<br>[M-H] <sup>-</sup>        | 357.0816     | 0.0              |
|           |                                 |                       | [M+NH <sub>4</sub> ] <sup>+</sup>     | 3.2                  | 376.1237         | 183.0651 [M+H-glucuronide] <sup>+</sup> , 165.0547 [M+H-glucuronide-H <sub>2</sub> O] <sup>+</sup>      | 183.065<br>DHPPA                               | 376.1238     | 0.1              |
|           |                                 |                       | [M+Na] <sup>+</sup><br>MCF-derivative | 3.2                  | 381.0791         | Not obtained                                                                                            | [M+H] <sup>+</sup>                             | 381.0792     | 0.1              |
| GC-MS     | 3-methyladipic acid             | 2                     |                                       | 13.24                |                  |                                                                                                         |                                                |              |                  |

UPLC-MS, ultra-performance liquid chromatography mass spectrometry; GC-MS, gas chromatography mass spectrometry; DHPPA, 3-(3,5-dihydroxyphenyl)-1-propanoic acid.

<sup>a</sup>Identification levels by Sumner et al, 2007; Metabolomics doi:10.1007/s11306-007-0082-2

**Table S14 Associations between serum inflammatory markers and urine metabolites**

| Urine metabolites        | Serum CRP   |         | Serum IL-6  |         |
|--------------------------|-------------|---------|-------------|---------|
|                          | Effect size | P-value | Effect size | P-value |
| DHPPA-glucuronide        | -0.49       | 0.032   | -0.44       | 0.002   |
| 2-aminophenol-sulphate   | -0.41       | 0.018   | -0.18       | 0.10    |
| Pyrocatechol-glucuronide | -0.59       | 0.023   | -0.14       | 0.41    |
| Pyrocatechol-sulphate    | -0.39       | 0.19    | 0.00        | 1.00    |
| 3-methyladipic acid      | -0.31       | 0.10    | -0.23       | 0.06    |

3,5-dihydroxyhydrocinnamic acid (DHPPA)-glucuronide

Calculated using linear mixed model adjusting for age and gender on log-transformed urine metabolome data (n=48).
